# Supplementary material for: The controllable synthesis of orange-red emissive Au nanoclusters and their use as a portable colorimetric fluorometric probe for dopamine
Source: Royal Society of Chemistry journal article supplement (doi:10.1039/d2nj00775d), 2022-01-01
Supplement: d2nj00775d1.pdf [file d2nj00775d1.pdf]

## Supplementary Information

### **The controllable synthesis of orange-red emissive Au nanoclusters and used as portable colorimetric fluorometric probe for dopamine**

Hongbo Wu,<sup>‡ab</sup> Yingjie Xu,<sup>‡b</sup> Ruyan Xie,<sup>b</sup> Mingyu Tang,<sup>b</sup> Lihua Chen,<sup>c</sup> Fengyu Qu,<sup>\*ab</sup> Changhong Guo,<sup>\*a</sup> Fang Chai<sup>\*ab</sup>

a. Key Laboratory of Molecular Cytogenetics and Genetic Breeding, College of Life Science and Technology, Harbin Normal University, Harbin, 150025, Heilongjiang Province, China. E-mail: qufengyu@hrbnu.edu.cn, kaku3008@hrbnu.edu.cn

b. Key Laboratory of Photochemical Biomaterials and Energy Storage Materials, Heilongjiang Province; Key Laboratory for Photonic and Electronic Bandgap Materials, Ministry of Education, College of Chemistry and Chemical Engineering, Harbin Normal University, Harbin, 150025, Heilongjiang Province, China. E-mail: fangchai@gmail.com

c. Shandong Key Laboratory of Biochemical Analysis, College of Chemistry and Molecular Engineering, Qingdao University of Science and Technology, Qingdao 266042, P. R. China

## 1. Optimum reaction conditions were optimized

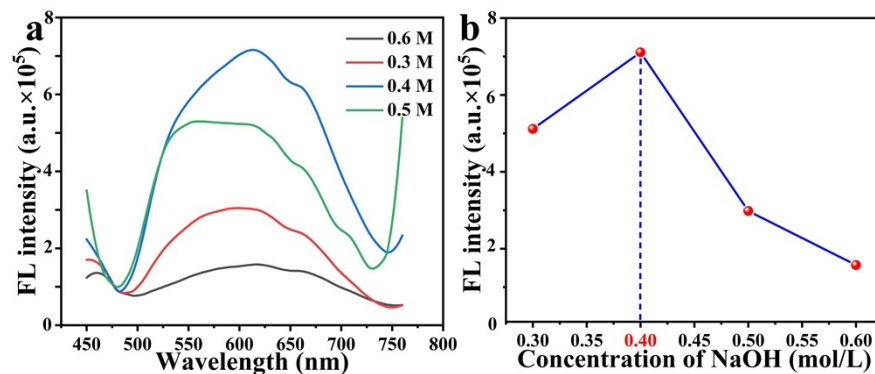

Fig. S1 The experiment of optimization of reaction concentrations of NaOH (0.3-0.6 M)

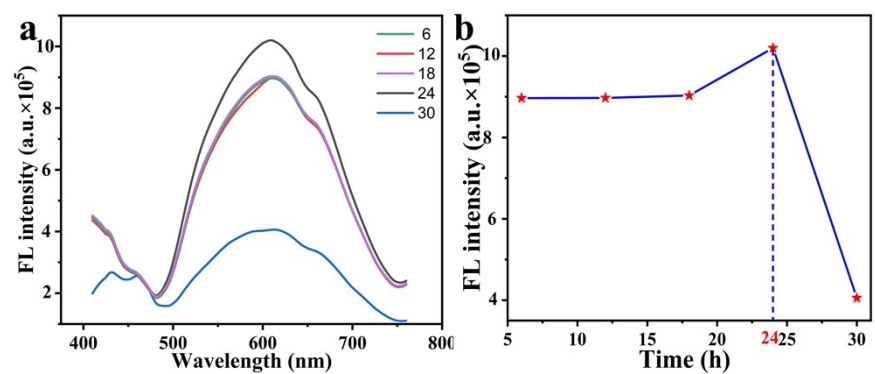

Fig S2 The experiment of optimization of reaction time (6-30 hours)

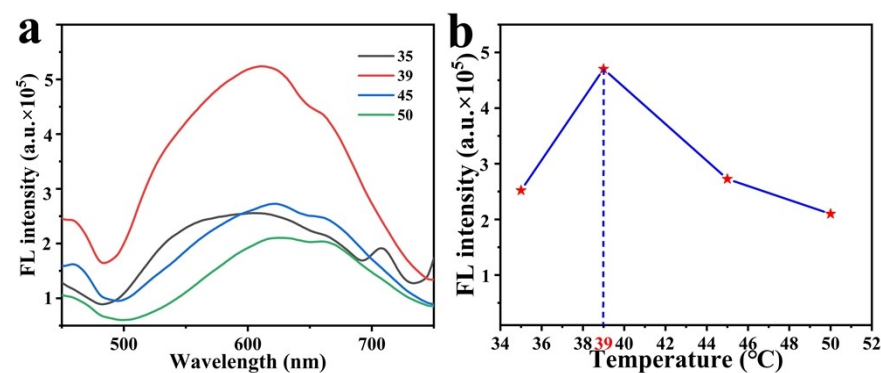

Fig. S3 The experiment of optimization of reaction temperature (35-50 °C )

## 2. Comparison of transmission microscope images before and after DA to M-AuNCs

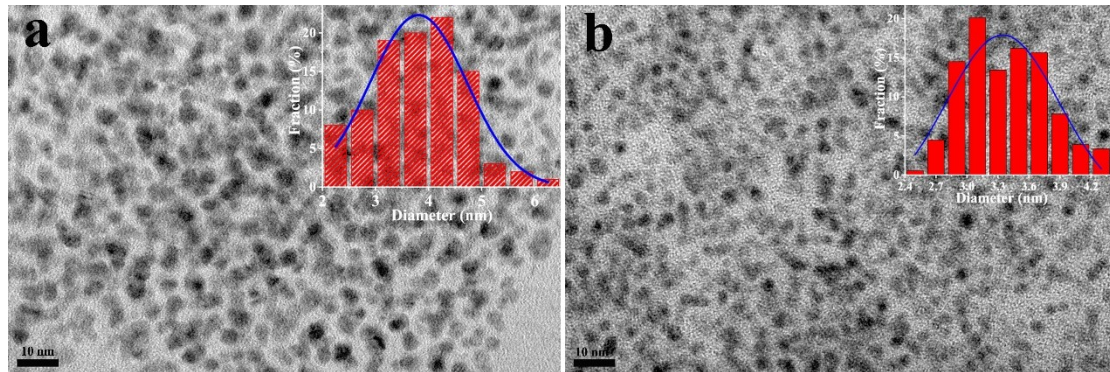

Fig. S4 TEM contrast of dopamine in M-AuNCs (a)TEM of M-AuNCs, (b)TEM of M-AuNCs+DA

### 3. Cellular imaging and MTT assay

The MTT test was carried out by using a microplate reader (Synergy HT, BioTek Instruments Inc., USA). To evaluate the cytotoxicity of the M-AuNCs, the viability of the U14 cells was assessed by measuring their ATP activity after exposure to the M-AuNCs. 100  $\mu$ L of the cell suspensions in cell media at a concentration of  $10^4$  cells/mL were seeded in 96-well plates and allowed to attach overnight. After removal of the cell media, the wells were washed twice with PBS buffer (pH=7.4) and then 100  $\mu$ L of the tested M-AuNCs at the relevant concentrations were added. After incubation, the reagent was added to each well to assess the ATP activity.

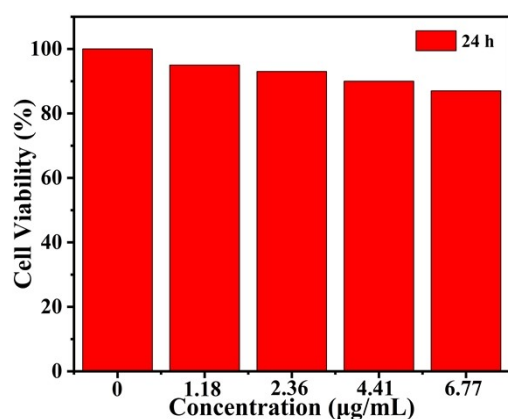

**Fig. S5.** Cell viabilities of U14 cells after incubation with M-AuNCs for 24 h by MTT assay.

#### Cellular imaging

After the U14 cells with M-AuNCs incubated for 4 h, majority cells showed light red light emission, indicated that the M-AuNCs were successfully absorbed by endocytosis. These results depicted that the prepared non-toxic and great biocompatibility pink fluorescent emission M-AuNCs could be excellently applied to the biological imaging.

#### 4. Recovery of DA in serum

Table S1 Recovery of DA in serum

| Sample | Added ( $\mu\text{M}$ ) | Total Found ( $\mu\text{M}$ ) | Recovery (%) | RSD<br>(%, n=5) |
|--------|-------------------------|-------------------------------|--------------|-----------------|
| serum  | 1.0                     | 0.995                         | 99.5         | 2.5             |
|        | 0.6                     | 0.611                         | 101.8        | 1.8             |
|        | 0.2                     | 0.203                         | 101.5        | 1.6             |

#### 5. The QY of the M-AuNCs

The QY of the M-AuNCs was obtained through reported methods.<sup>[1]</sup> The related data were measured under the same excitation wavelength and slit bandwidths. The formula is as follows.

$$Q_{AuNCs} = Q_R \left( \frac{I_{AuNCs}}{I_R} \right) \left( \frac{A_R}{A_{AuNCs}} \right) \left( \frac{\eta_{AuNCs}^2}{\eta_R^2} \right)$$

where QY is the quantum yield of M-AuNCs, I refers to the integral area under FL spectra,  $\eta$  represents the refractive index of solvent, A refers to the UV-vis absorbance under the excitation wavelength. R is the reference (quinine sulfate).

[1] H. Huang, H. Li, A. Wang, S. Zhong, K. Fang and J. Feng, *Analyst*, 2014, **139**, 6536-6541.
